# Supplementary material for: The Dynamics of Microcystis Genotypes and Microcystin Production and Associations with Environmental Factors during Blooms in Lake Chaohu, China
Source: MDPI journal article supplement (doi:10.3390/toxins6123238), 2014-12-02
Supplement: s1 [file s1]

## Supplementary Information

**Table S1.** Environmental variables summarized as the mean values and ranges in Lake Chaohu during bloom from June to October 2012.

| Parameter                                              | June                   | July                   | August                 | September              | October                |
|--------------------------------------------------------|------------------------|------------------------|------------------------|------------------------|------------------------|
| TN (mg L <sup>-1</sup> )                               | 2.22 (1.15–5.09)       | 1.83 (0.65–3.59)       | 1.25 (0.56–3.03)       | 1.45 (0.63–3.67)       | 1.57 (0.80–3.49)       |
| NH <sub>4</sub> <sup>+</sup> -N (mg L <sup>-1</sup> )  | 0.70 (0.21–3.55)       | 0.22 (0.06–0.49)       | 0.20 (0.06–0.65)       | 0.21 (0.04–1.16)       | 0.15 (0.11–0.19)       |
| NO <sub>3</sub> <sup>-</sup> -N (mg L <sup>-1</sup> )  | 0.28 (0.21–0.38)       | 0.24 (0.06–0.70)       | 0.11 (0.08–0.23)       | 0.22 (0.08–0.61)       | 0.17 (0.07–0.49)       |
| NO <sub>2</sub> <sup>-</sup> -N (mg L <sup>-1</sup> )  | 0.06 (0.01–0.18)       | 0.06 (0.00–0.37)       | 0.01 (0.00–0.07)       | 0.02 (0.00–0.12)       | 0.01 (0.00–0.07)       |
| TP (mg L <sup>-1</sup> )                               | 0.13 (0.04–0.39)       | 0.13 (0.04–0.24)       | 0.09 (0.03–0.22)       | 0.12 (0.04–0.27)       | 0.15 (0.04–0.28)       |
| PO <sub>4</sub> <sup>3-</sup> -P (mg L <sup>-1</sup> ) | 0.04 (0.00–0.26)       | 0.01 (0.00–0.03)       | 0.01 (0.00–0.02)       | 0.03 (0.00–0.12)       | 0.03 (0.00–0.52)       |
| DIC (mg L <sup>-1</sup> )                              | 14.39 (11.66–17.28)    | 13.69 (9.64–15.00)     | 12.58 (8.74–15.67)     | 13.38 (10.04–17.71)    | 14.42 (11.94–16.22)    |
| DOC (mg L <sup>-1</sup> )                              | 5.14 (4.53–7.46)       | 5.10 (4.48–5.70)       | 4.50 (4.07–4.97)       | 5.45 (4.64–6.72)       | 4.50 (3.99–5.19)       |
| Chl-a (µg L <sup>-1</sup> )                            | 23.73 (10.04–52.45)    | 30.07 (5.70–89.40)     | 42.61 (6.19–89.06)     | 18.78 (5.86–32.14)     | 21.76 (6.64–53.57)     |
| Water temperature (°C)                                 | 27.43 (26.21–28.12)    | 27.68 (26.30–29.28)    | 30.18 (29.48–30.75)    | 22.63 (22.11–23.63)    | 18.77 (18.43–19.45)    |
| pH                                                     | 8.29 (7.42–8.74)       | 8.69 (8.50–8.84)       | 9.13 (8.70–9.40)       | 6.29 (5.22–6.74)       | 5.71 (4.73–6.37)       |
| DO (mg L <sup>-1</sup> )                               | 8.97 (4.60–10.11)      | 8.70 (5.17–10.08)      | 6.18 (4.47–7.64)       | 9.41 (8.33–10.53)      | 10.67 (4.79–14.97)     |
| Secchi depth (m)                                       | 0.36 (0.25–0.45)       | 0.28 (0.20–0.42)       | 0.57 (0.20–0.90)       | 0.43 (0.30–0.65)       | 0.30 (0.15–0.55)       |
| Water depth (m)                                        | 2.86 (1.90–3.40)       | 3.50 (2.40–4.20)       | 3.88 (2.70–4.50)       | 4.00 (2.60–4.50)       | 3.66 (2.90–4.30)       |
| Conductivity (µS cm <sup>-1</sup> )                    | 348.78 (283.00–392.00) | 317.20 (294.00–344.00) | 303.33 (240.00–340.00) | 280.48 (213.00–351.00) | 282.44 (223.00–329.00) |
